# Supplementary material
Source: MDPI journal article supplement (https://www.mdpi.com/1424-8247/15/7/862)
Supplement: s1 [file s1]

# Design and Anticancer Properties of New Water-Soluble Ruthenium–Cyclopentadienyl Complexes

Tânia S. Morais <sup>1,\*</sup>, Fernanda Marques <sup>2</sup>, Paulo J. Amorim Madeira <sup>3</sup>, Maria Paula Robalo <sup>4</sup> and Maria Helena Garcia <sup>1,\*</sup>

<sup>1</sup> Centro de Química Estrutural, Institute of Molecular Sciences, Faculdade de Ciências, Universidade de Lisboa, Campo Grande, 1749-016 Lisboa, Portugal

<sup>2</sup> Centro de Ciências e Tecnologias Nucleares, Instituto Superior Técnico, Universidade de Lisboa, Estrada Nacional 10 (km 139,7), 2695-066 Lisboa, Portugal; fmarujo@ctn.tecnico.ulisboa.pt

<sup>3</sup> Ascenza Agro, SA, Av. do Rio Tejo-Parq. Ind. Sapeç Bay, 2910-440 Setúbal, Portugal; paulo.madeira@ascenza.rovensa.com

<sup>4</sup> Centro de Química Estrutural, Institute of Molecular Sciences, Instituto Superior Técnico, Universidade de Lisboa, Av. Rovisco Pais, 1049-001 Lisboa, Portugal; mprobalo@deq.isel.ipl.pt

## *Electrochemical characterization of complexes*

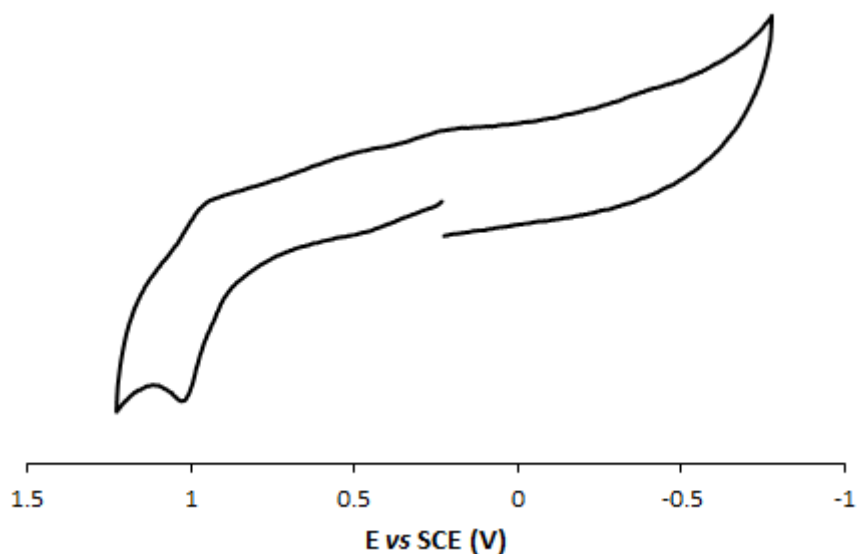

**Figure S1.** Cyclic voltammogram of complex **7** in dichloromethane at 200 mV.s<sup>-1</sup> with a Pt disk WE.

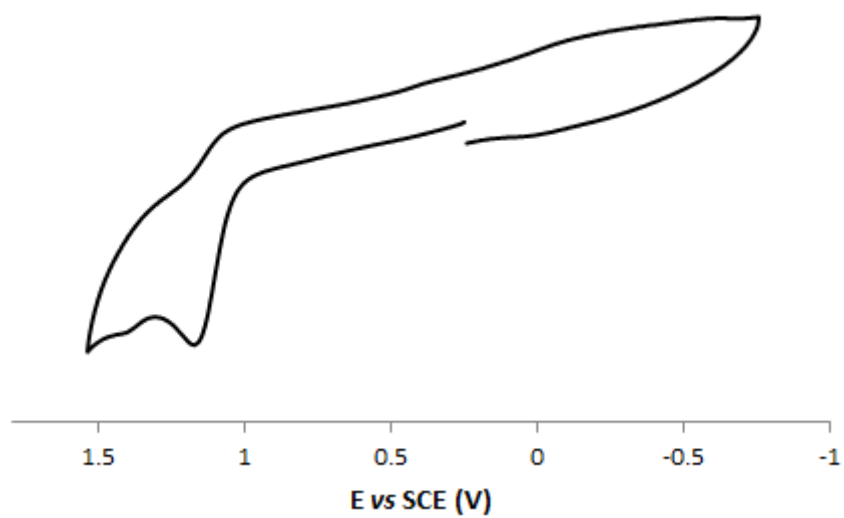

**Figure S2.** Cyclic voltammogram of complex **8** in dichloromethane at 200 mV.s<sup>-1</sup> with a Pt disk WE.

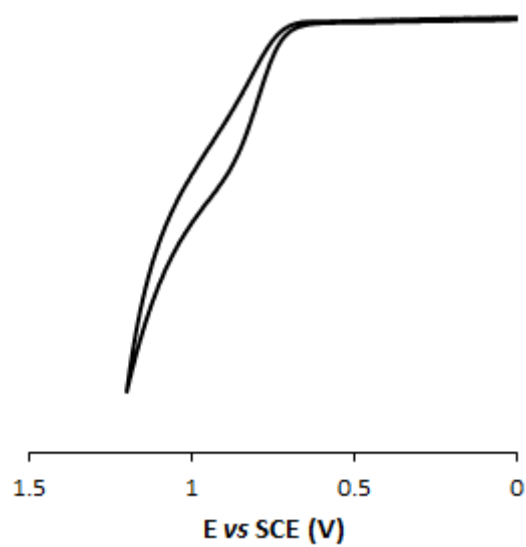

**Figure S3.** Cyclic voltammogram of complex **1** in Hepes buffer at 50 mV.s<sup>-1</sup> with a GC disk WE.

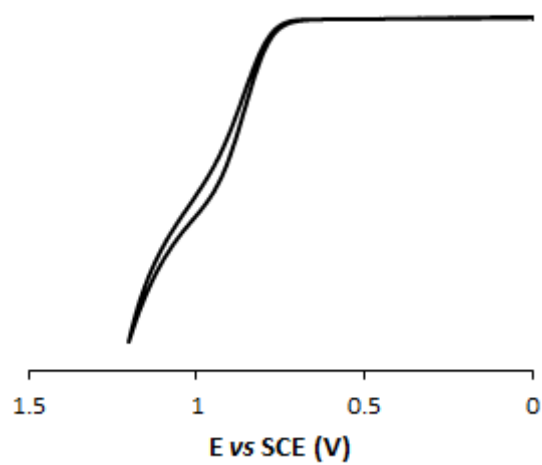

**Figure S4.** Cyclic voltammogram of complex **2** in Hepes buffer at 50 mV.s<sup>-1</sup> with a GC disk WE.

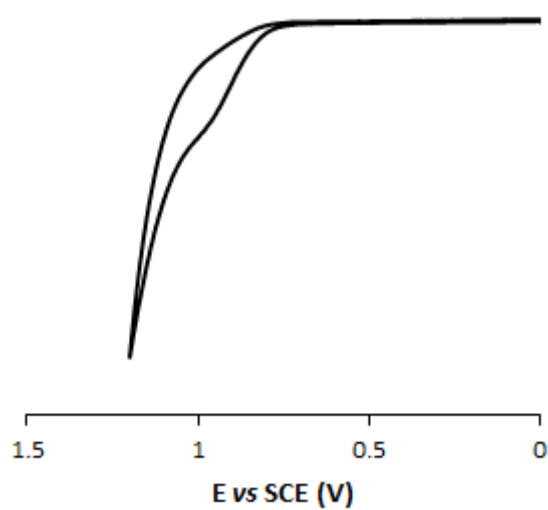

**Figure S5.** Cyclic voltammogram of complex **3** in Hepes buffer at 50 mV.s<sup>-1</sup> with a GC disk WE.

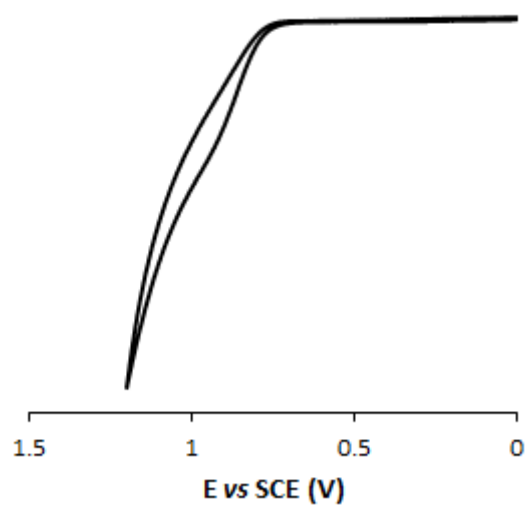

**Figure S6.** Cyclic voltammogram of complex **4** in Hepes buffer at 50 mV.s<sup>-1</sup> with a GC disk WE.

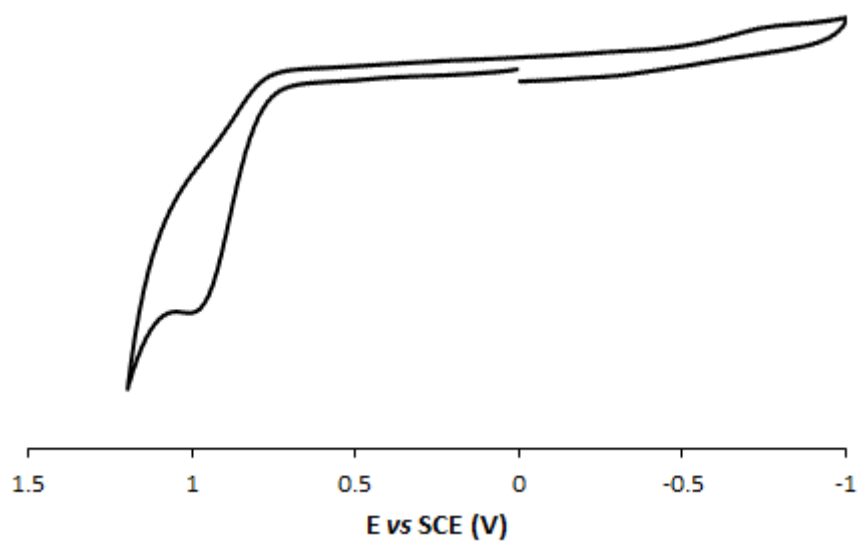

**Figure S7.** Cyclic voltammogram of complex **5** in Hepes buffer at 50 mV.s<sup>-1</sup> with a GC disk WE.

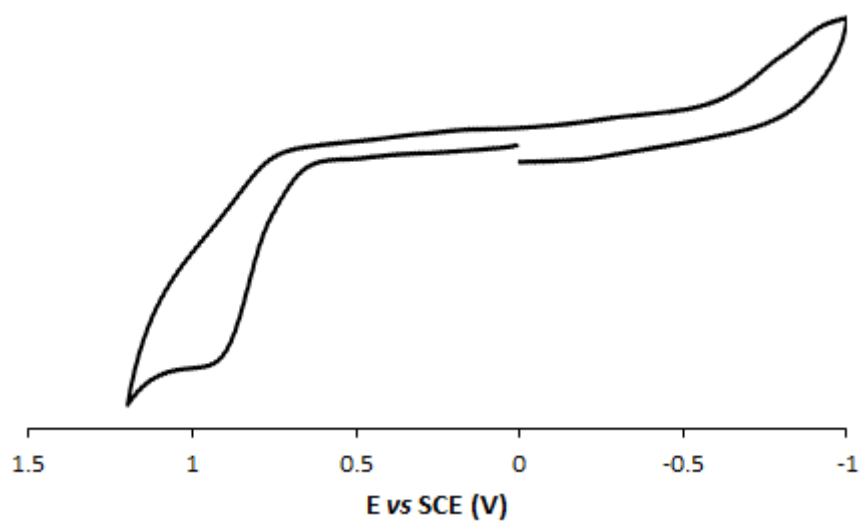

**Figure S8.** Cyclic voltammogram of complex 7 in Hepes buffer at 50 mV.s<sup>-1</sup> with a GC disk WE.

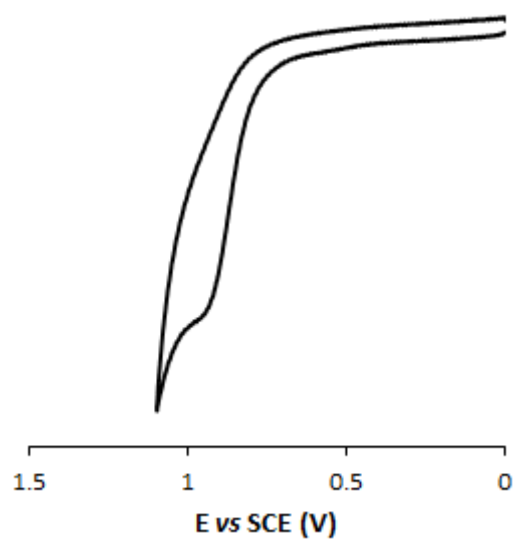

**Figure S9.** Cyclic voltammogram of complex 8 in Hepes buffer at 50 mV.s<sup>-1</sup> with a GC disk WE.

**Fluorescence quenching of HSA by complex  $[\text{Ru}(\eta^5\text{-C}_5\text{H}_5)(m\text{TPPMS})(\text{bopy})][\text{CF}_3\text{SO}_3]$  (6)**

Stern-Volmer equation:

$$\frac{F_0}{F} = 1 + K_q \tau_0 (Q) = 1 + K_{SV} (Q) \quad (\text{S1})$$

where  $F_0$  and  $F$  are the fluorescence intensities of HSA in the absence and presence of the quencher  $[\text{Ru}(\eta^5\text{-C}_5\text{H}_5)(m\text{TPPMS})(\text{bopy})][\text{CF}_3\text{SO}_3]$ ;  $[Q]$  is the quencher concentration;  $K_q$  is the bimolecular quenching constant;  $\tau_0$  is the average fluorescence lifetime of HSA in the absence of the quencher, and  $K_{SV}$  is the Stern-Volmer quenching constant.

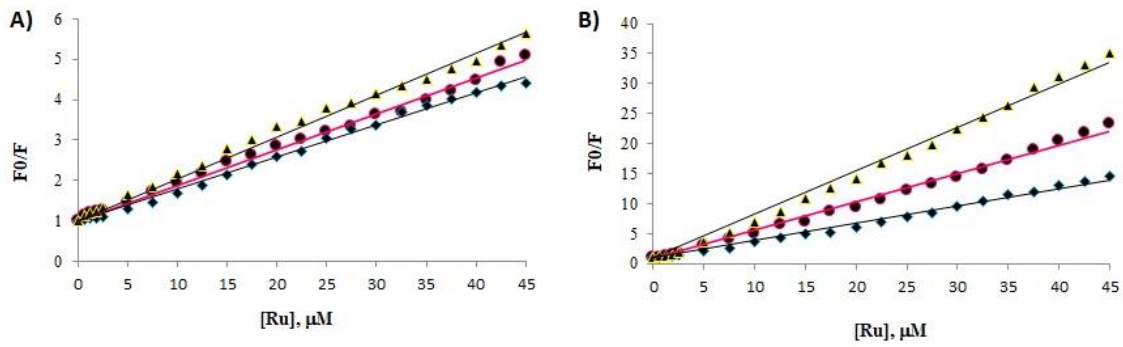

**Figure S10.** Stern-Volmer plots at pH7.4 for the quenching of (A) HSA and (B) HSA<sup>faf</sup> by  $[\text{Ru}(\eta^5\text{-C}_5\text{H}_5)(m\text{TPPMS})(\text{bopy})][\text{CF}_3\text{SO}_3]$  at three temperatures (♦) 293 K, (●) 298 K, (▲) 310 K.

$$\log \left( \frac{F_0 - F}{F} \right) = \log K_a + n \log [Q] \quad (\text{S2})$$

where  $K_a$  is the association constant for a site and  $n$  is the number of binding sites by protein.

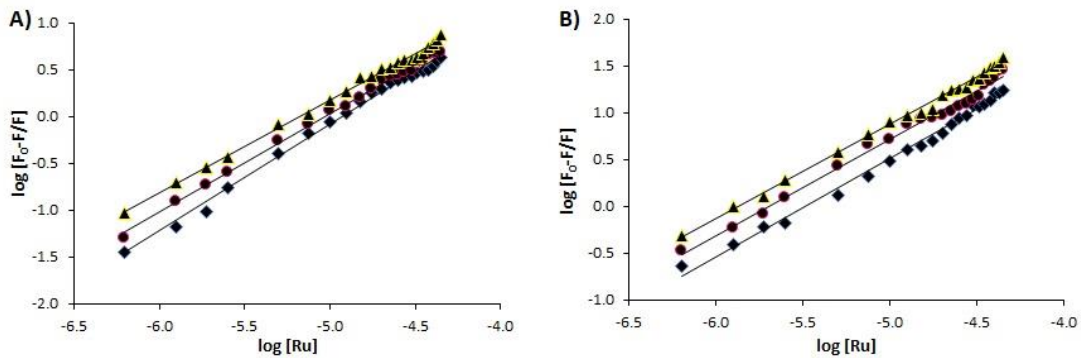

**Figure S11.** Double-log plots for the fluorescence quenching for the (A)  $\{\text{HSA}-[\text{Ru}(\eta^5\text{-C}_5\text{H}_5)(m\text{TPPMS})(\text{bopy})][\text{CF}_3\text{SO}_3]\}$  and (B)  $\{\text{HSA}^{\text{faf}}-[\text{Ru}(\eta^5\text{-C}_5\text{H}_5)(m\text{TPPMS})(\text{bopy})][\text{CF}_3\text{SO}_3]\}$  systems at three temperatures (♦) 293 K, (●) 298 K, (▲) 310 K.

Van't Hoff equations:

$$\ln K_q = -\frac{\Delta H}{RT} + \frac{\Delta S}{R} \quad (\text{S3})$$

$$\Delta G = \Delta H - T\Delta S \quad (\text{S4})$$

where R is the gas constant and T is the experimental temperature.

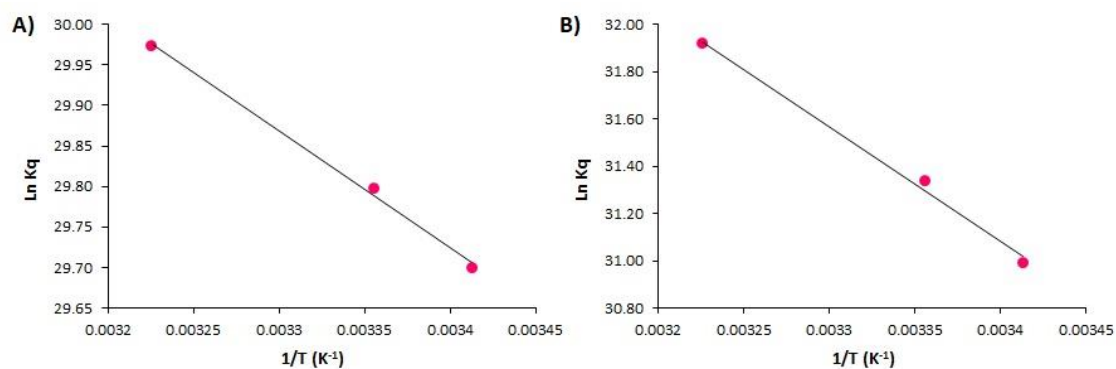

**Figure S12.** Van't Hoff plots quenching for the (A)  $\{\text{HSA}-[\text{Ru}(\eta^5\text{-C}_5\text{H}_5)(m\text{TPPMS})(bopy)][\text{CF}_3\text{SO}_3]\}$  and (B)  $\{\text{HSA}^{\text{fa}^{\text{f}}}-[\text{Ru}(\eta^5\text{-C}_5\text{H}_5)(m\text{TPPMS})(bopy)][\text{CF}_3\text{SO}_3]\}$  systems.
